# Supplementary material
Source: publisher figshare collection journal article supplement (https://gsapubs.figshare.com/ndownloader/files/22739588)
Supplement: Supplementary file 1 [file 22739588]

GSA Data Repository Item # 7614

Title of article Revision of Upper Ordovician Silurian and Lower Devonian  
Basin

Author(s) R. H. Miller

see GSA Bulletin v. 87, p. 961 - 968

Contents 2 pages

Appendix 1 - Location of Measured Sections

APPENDIX 1. LOCATION OF MEASURED SECTIONS

Section ES1 (Ely Springs Dolomite). Located 3.6 km N45E of the northeast boundary of Section 25, T12S, R36E. Approximate location of section ES-4 of Ross(1966, p.54), Independence quadrangle, Inyo County, California. Measured thickness: 105.2 m. UCLA location number 6162.

Section ES2 (Ely Springs Dolomite). Located 8.9 km south of section ES1, in the NE $\frac{1}{4}$  of Section 8, T13S, R36E. Location of section ES-1 of Ross (1966, p.51) in Willow Springs Canyon, Independence quadrangle. Measured thickness: 160.7 meters. UCLA location number 6163.

Section ES4 (Ely Springs Dolomite) Eastern-one-half of Section 2, T12S, R45E, Bullfrog quadrangle, Nye County, Nevada and Inyo County, California. Along small ridge, northwest of Bullfrog Mountain, as described by Cornwall & Kleinhampl (1964, p.J5). Measured thickness: 119m. UCLA location number 6243.

Section ES6 (Ely Springs Dolomite). Base of section in NE $\frac{1}{4}$  of NE $\frac{1}{4}$  of Section 12, T23N, R7E, Stewart Valley quadrangle, Inyo County, California. Approximately along section F - F' of Hazzard (1937, p.294). Measured thickness: 363m. UCLA location number 6244.

Section RM1 (Roberts Mountains Formation). Location same as for section ES4. Measured thickness 335m. UCLA location number 6245.

Section HV3 (upper part of Ely Springs Dolomite and Hidden Valley Dolomite). Approximately 6 km due north of Ubehebe Peak, R40E, T14S, Ubehebe Peak quadrangle, Inyo County, California. Section measured on ridge approximately 1.6 km north of the type section of the Hidden Valley Dolomite of McAllister (1952, p.15). Measured thickness: 30m of Ely Springs Dolomite and 420m of Hidden Valley Dolomite. UCLA location number 6246.

Section HV5 (Ely Springs Dolomite, Hidden Valley Dolomite, and lower part of Lost Burro Formation). Approximately 1.6 km S30E of Swansea, NW $\frac{1}{4}$  of Section 30, T16S, R37E, New York Butte quadrangle, Inyo County, California. Section measured on ridge above smelter ruins, approximately 4 km south of the section at the Salt Mill Hills of Merriam (1963, p.12). Measured thickness of three formations: 620m. UCLA location number 6247.

Section HV8 (Hidden Valley Dolomite). Located in SE $\frac{1}{4}$  of NW $\frac{1}{4}$  of Section 6, T23N, R8E, Stewart Valley quadrangle, Inyo County, California. Approximately along section F-F' of Hazzard (1937, p.294). Measured thickness: 147m. UCLA location number 6249.

Section VG1 (Vaughn Gulch Limestone). Location same as for section ES2. Type section of Vaughn Gulch Limestone, equivalent to section VG-1 of Ross (1966, p.56). Thickness measured: 443m. UCLA location number 6250.

Section SC2 (Sunday Canyon Formation). Approximately 1 km due east of the southeast corner of Section 36, T11S, R35E, Independence quadrangle. Approximately equivalent to section SC-5 of Ross (1966, p.58). Thickness measured: 114m. UCLA location number 6251.

Section SC3 (Sunday Canyon Formation). Along ridge above Bonanza Gulch. Base of section approximately 3 km northeast of the NE corner of Section 25, T12S, R35E, Independence quadrangle. Approximately same location as type section of the Sunday Canyon Formation (section SC-1) of Ross (1966, p.57). Thickness Measured: 185m. UCLA location number 6252.
